# Supplementary material
Source: ML conference proceedings conference paper supplement (https://proceedings.neurips.cc/paper_files/paper/2016/hash/42998cf32d552343bc8e460416382dca-Abstract.html)
Supplement: Supplementary file [file 42998cf32d552343bc8e460416382dca-Supplemental.zip]

## A Proof of Theorem 1

*Proof.* It is easy to see that by the end of the first iteration of Algorithm 1,  $\tilde{\psi}_1$  and  $\psi_1$  lie in the span of  $\{\mathbf{b}_i\}_{i=1}^r$ , while  $\tilde{\phi}_1$  and  $\phi_1$  lie in the span of  $\{\mathbf{a}_i\}_{i=1}^r$ . And therefore they remain in these spaces for all  $t \geq 1$ .

Let us first focus on  $\phi_t$ . For  $t \geq 2$ , we observe that

$$\phi_t = \mathbf{T}\psi_{t-1} / \|\tilde{\phi}_t\| = \mathbf{T}\mathbf{T}^\top \phi_{t-2} / (\|\tilde{\phi}_t\| \cdot \|\tilde{\psi}_{t-1}\|).$$

Since  $\|\phi_{t-2}\| = \|\phi_t\| = 1$ , it is equivalent to using the following updates:

$$\phi_t \leftarrow \mathbf{T}\mathbf{T}^\top \phi_{t-2}, \quad \phi_t \leftarrow \phi_t / \|\phi_t\|.$$

This indicates that, Algorithm 1 runs the standard power iterations on  $\mathbf{T}\mathbf{T}^\top$  to generate the  $\{\phi_t\}_{t \geq 1}$  sequence for every two steps.

(i) For  $t = 2, 4, \dots$ , we have  $\phi_t = \frac{(\mathbf{T}\mathbf{T}^\top)^{\frac{t}{2}} \phi_0}{\|(\mathbf{T}\mathbf{T}^\top)^{\frac{t}{2}} \phi_0\|}$ . Let  $\mathbf{M} = \mathbf{T}\mathbf{T}^\top$ , whose nonzero eigenvalues are  $\rho_1^2 \geq \rho_2^2 \geq \dots \geq \rho_r^2 > 0$ , with corresponding eigenvectors  $\mathbf{a}_1, \dots, \mathbf{a}_r$ . Then, for  $i = 1, \dots, r$ ,

$$\begin{aligned} (\mathbf{a}_i^\top \phi_t)^2 &= \frac{(\mathbf{a}_i^\top \mathbf{M}^{\frac{t}{2}} \phi_0)^2}{\|\mathbf{M}^{\frac{t}{2}} \phi_0\|^2} = \frac{(\mathbf{a}_i^\top \mathbf{M}^{\frac{t}{2}} \phi_0)^2}{\phi_0^\top \mathbf{M}^t \phi_0} = \frac{(\rho_i^t \mathbf{a}_i^\top \phi_0)^2}{\sum_{j=1}^r \rho_j^{2t} (\mathbf{a}_j^\top \phi_0)^2} = \frac{(\mathbf{a}_i^\top \phi_0)^2}{\sum_{j=1}^r \left(\frac{\rho_j^2}{\rho_i^2}\right)^t (\mathbf{a}_j^\top \phi_0)^2} \\ &\leq \frac{(\mathbf{a}_i^\top \phi_0)^2}{\left(\frac{\rho_1^2}{\rho_i^2}\right)^t (\mathbf{a}_1^\top \phi_0)^2} = \frac{(\mathbf{a}_i^\top \phi_0)^2}{(\mathbf{a}_1^\top \phi_0)^2} \left(\frac{\rho_i^2}{\rho_1^2}\right)^t = \frac{(\mathbf{a}_i^\top \phi_0)^2}{(\mathbf{a}_1^\top \phi_0)^2} \left(1 - \frac{\rho_1^2 - \rho_i^2}{\rho_1^2}\right)^t \\ &\leq \frac{(\mathbf{a}_i^\top \phi_0)^2}{(\mathbf{a}_1^\top \phi_0)^2} \exp\left(-\frac{\rho_1^2 - \rho_i^2}{\rho_1^2} t\right). \end{aligned}$$

(ii) For  $t = 1, 3, \dots$ , we have  $\phi_t = \frac{(\mathbf{T}\mathbf{T}^\top)^{\frac{t-1}{2}} \mathbf{T}\psi_0}{\|(\mathbf{T}\mathbf{T}^\top)^{\frac{t-1}{2}} \mathbf{T}\psi_0\|}$ . Let  $\mathbf{N} = \mathbf{T}^\top \mathbf{T}$ , whose nonzero eigenvalues are  $\rho_1^2 \geq \rho_2^2 \geq \dots \geq \rho_r^2 > 0$ , with corresponding eigenvectors  $\mathbf{b}_1, \dots, \mathbf{b}_r$ . Then, for  $i = 1, \dots, r$ ,

$$\begin{aligned} (\mathbf{a}_i^\top \phi_t)^2 &= \frac{(\mathbf{a}_i^\top (\mathbf{T}\mathbf{T}^\top)^{\frac{t-1}{2}} \mathbf{T}\psi_0)^2}{\|(\mathbf{T}\mathbf{T}^\top)^{\frac{t-1}{2}} \mathbf{T}\psi_0\|^2} = \frac{((\mathbf{T}^\top \mathbf{a}_i)^\top \mathbf{N}^{\frac{t-1}{2}} \psi_0)^2}{\psi_0^\top \mathbf{N}^t \psi_0} = \frac{(\rho_i^t \mathbf{b}_i^\top \psi_0)^2}{\sum_{j=1}^r \rho_j^{2t} (\mathbf{b}_j^\top \psi_0)^2} \\ &\leq \frac{(\mathbf{b}_i^\top \psi_0)^2}{(\mathbf{b}_1^\top \psi_0)^2} \exp\left(-\frac{\rho_1^2 - \rho_i^2}{\rho_1^2} t\right). \end{aligned}$$

Given  $\delta \in (0, 1)$ , define  $S(\delta) = \{i : \rho_i^2 > (1 - \delta)\rho_1^2\}$ . For  $\delta_1, \delta_2 \in (0, 1)$ , define

$$T(\delta_1, \delta_2) := \lceil \frac{1}{\delta_1} \log\left(\frac{1}{\mu\delta_2}\right) \rceil.$$

For all  $i \notin S(\delta_1)$ , when  $t > T(\delta_1, \delta_2)$ , it holds that  $(\mathbf{a}_i^\top \phi_t)^2 \leq \delta_2 (\mathbf{a}_i^\top \phi_0)^2$  if  $t$  is even, and  $(\mathbf{a}_i^\top \phi_t)^2 \leq \delta_2 (\mathbf{b}_i^\top \psi_0)^2$  if  $t$  is odd. In both cases, we have  $\sum_{i \in S(\delta_1)} (\mathbf{a}_i^\top \phi_t)^2 \geq 1 - \delta_2$ .

When there exists a positive singular value gap, i.e.,  $\rho_1 - \rho_2 > 0$ , set  $\delta_1 = (\rho_1^2 - \rho_2^2)/\rho_1^2$  and thus  $S(\delta_1) = 1$ . Furthermore, set  $\delta_2 = \eta$  and we obtain  $(\mathbf{a}_1^\top \phi_t)^2 \geq 1 - \eta$ .

The proof for  $\psi_t$  is completely analogous. To obtain the bound on the objective, we have

$$\begin{aligned}
\mathbf{u}_t^\top \Sigma_{xy} \mathbf{v}_t &= \phi_t^\top \mathbf{T} \psi_t = \rho_1 (\phi_t^\top \mathbf{a}_1) (\psi_t^\top \mathbf{b}_1) + \sum_{i=2}^r \rho_i (\phi_t^\top \mathbf{a}_i) (\psi_t^\top \mathbf{b}_i) \\
&\geq \rho_1 (\phi_t^\top \mathbf{a}_1) (\psi_t^\top \mathbf{b}_1) - \rho_1 \sum_{i=2}^r \left| \phi_t^\top \mathbf{a}_i \right| \left| \psi_t^\top \mathbf{b}_i \right| \\
&\geq \rho_1 (1 - \eta) - \rho_1 \sqrt{\sum_{i=2}^r \left( \phi_t^\top \mathbf{a}_i \right)^2} \sqrt{\sum_{i=2}^r \left( \psi_t^\top \mathbf{b}_i \right)^2} \\
&\geq \rho_1 (1 - \eta) - \rho_1 \eta = \rho_1 (1 - 2\eta),
\end{aligned}$$

where we have used the Cauchy-Schwarz inequality in the second inequality.  $\square$

## B Proof of Theorem 2

From now on, we distinguish the iterates of our stochastic algorithm (Algorithm 2) from the iterates of the exact power iterations (Algorithm 1) and denote the latter with asterisks, i.e.,  $\tilde{\mathbf{u}}_t^*$  and  $\tilde{\mathbf{v}}_t^*$  for the unnormalized iterates and  $\mathbf{u}_t^*$  and  $\mathbf{v}_t^*$  for the normalized iterates. We denote the exact optimum of  $f_t(\mathbf{u})$  and  $g_t(\mathbf{v})$  by  $\bar{\mathbf{u}}_t$  and  $\bar{\mathbf{v}}_t$  respectively.

The following lemma bounds the distance between the iterates of inexact and exact power iterations.

**Lemma 6.** Assume that Algorithm 1 and Algorithm 2 start with the same initialization, i.e.,  $\tilde{\mathbf{u}}_0 = \tilde{\mathbf{u}}_0^*$  and  $\tilde{\mathbf{v}}_0 = \tilde{\mathbf{v}}_0^*$ . Then, for  $t \geq 1$ , the unnormalized iterates of Algorithm 2 satisfy

$$\max \left( \left\| \Sigma_{xx}^{\frac{1}{2}} \tilde{\mathbf{u}}_t - \Sigma_{xx}^{\frac{1}{2}} \tilde{\mathbf{u}}_t^* \right\|, \left\| \Sigma_{yy}^{\frac{1}{2}} \tilde{\mathbf{v}}_t - \Sigma_{yy}^{\frac{1}{2}} \tilde{\mathbf{v}}_t^* \right\| \right) \leq \tilde{S}_t,$$

where

$$\tilde{S}_t := \sqrt{2\epsilon} \frac{(2\rho_1/\rho_r)^t - 1}{(2\rho_1/\rho_r) - 1}.$$

Furthermore, for  $t \geq 1$ , the normalized iterates of Algorithm 2 satisfy

$$\max \left( \left\| \Sigma_{xx}^{\frac{1}{2}} \mathbf{u}_t - \Sigma_{xx}^{\frac{1}{2}} \mathbf{u}_t^* \right\|, \left\| \Sigma_{yy}^{\frac{1}{2}} \mathbf{v}_t - \Sigma_{yy}^{\frac{1}{2}} \mathbf{v}_t^* \right\| \right) \leq S_t := \frac{2\tilde{S}_t}{\rho_r}.$$

*Proof.* We focus on the  $\{\tilde{\mathbf{u}}_t\}_{t \geq 0}$  and  $\{\mathbf{u}_t\}_{t \geq 0}$  sequences below; the proof for  $\{\tilde{\mathbf{v}}_t\}_{t \geq 0}$  and  $\{\mathbf{v}_t\}_{t \geq 0}$  is completely analogous.

We prove the bound for unnormalized iterates by induction. First, the case for  $t = 1$  holds trivially. For  $t \geq 2$ , we can bound the error of the unnormalized iterates using the exact solution to  $f_t(\mathbf{u})$ :

$$\left\| \Sigma_{xx}^{\frac{1}{2}} \tilde{\mathbf{u}}_t - \Sigma_{xx}^{\frac{1}{2}} \tilde{\mathbf{u}}_t^* \right\| \leq \left\| \Sigma_{xx}^{\frac{1}{2}} \tilde{\mathbf{u}}_t - \Sigma_{xx}^{\frac{1}{2}} \bar{\mathbf{u}}_t \right\| + \left\| \Sigma_{xx}^{\frac{1}{2}} \bar{\mathbf{u}}_t - \Sigma_{xx}^{\frac{1}{2}} \tilde{\mathbf{u}}_t^* \right\|. \quad (14)$$

For the first term of (14), notice  $f_t(\mathbf{u})$  is a quadratic function with minimum achieved at  $\bar{\mathbf{u}}_t = \Sigma_{xx}^{-1} \Sigma_{xy} \mathbf{v}_{t-1}$ . For the approximate solution  $\tilde{\mathbf{u}}_t$ , we have

$$f_t(\tilde{\mathbf{u}}_t) - f_t(\bar{\mathbf{u}}_t) = \frac{1}{2} (\tilde{\mathbf{u}}_t - \bar{\mathbf{u}}_t)^\top \Sigma_{xx} (\tilde{\mathbf{u}}_t - \bar{\mathbf{u}}_t) = \frac{1}{2} \left\| \Sigma_{xx}^{\frac{1}{2}} \tilde{\mathbf{u}}_t - \Sigma_{xx}^{\frac{1}{2}} \bar{\mathbf{u}}_t \right\|^2 \leq \epsilon.$$

It then follows that  $\left\| \Sigma_{xx}^{\frac{1}{2}} \tilde{\mathbf{u}}_t - \Sigma_{xx}^{\frac{1}{2}} \bar{\mathbf{u}}_t \right\| \leq \sqrt{2\epsilon}$ .

The second term of (14) is concerned with the error due to inexact target in the least squares problem  $f_t(\mathbf{u})$  as  $\mathbf{v}_{t-1}$  is different from  $\mathbf{v}_{t-1}^*$ . We can bound it as

$$\begin{aligned}
\left\| \Sigma_{xx}^{\frac{1}{2}} \bar{\mathbf{u}}_t - \Sigma_{xx}^{\frac{1}{2}} \tilde{\mathbf{u}}_t^* \right\| &= \left\| \Sigma_{xx}^{\frac{1}{2}} \Sigma_{xx}^{-1} \Sigma_{xy} \mathbf{v}_{t-1} - \Sigma_{xx}^{\frac{1}{2}} \Sigma_{xx}^{-1} \Sigma_{xy} \mathbf{v}_{t-1}^* \right\| \\
&= \left\| \left( \Sigma_{xx}^{-\frac{1}{2}} \Sigma_{xy} \Sigma_{yy}^{-\frac{1}{2}} \right) \left( \Sigma_{yy}^{\frac{1}{2}} (\mathbf{v}_{t-1} - \mathbf{v}_{t-1}^*) \right) \right\| \\
&\leq \|\mathbf{T}\| \left\| \Sigma_{yy}^{\frac{1}{2}} \mathbf{v}_{t-1} - \Sigma_{yy}^{\frac{1}{2}} \mathbf{v}_{t-1}^* \right\| = \rho_1 \left\| \Sigma_{yy}^{\frac{1}{2}} \mathbf{v}_{t-1} - \Sigma_{yy}^{\frac{1}{2}} \mathbf{v}_{t-1}^* \right\|. \quad (15)
\end{aligned}$$

In view of the update rule of our algorithm and the triangle inequality, we have

$$\begin{aligned}
& \left\| \Sigma_{yy}^{\frac{1}{2}} \mathbf{v}_{t-1} - \Sigma_{yy}^{\frac{1}{2}} \mathbf{v}_{t-1}^* \right\| \\
& \leq \left\| \frac{\Sigma_{yy}^{\frac{1}{2}} \tilde{\mathbf{v}}_{t-1}}{\left\| \Sigma_{yy}^{\frac{1}{2}} \tilde{\mathbf{v}}_{t-1} \right\|} - \frac{\Sigma_{yy}^{\frac{1}{2}} \tilde{\mathbf{v}}_{t-1}}{\left\| \Sigma_{yy}^{\frac{1}{2}} \tilde{\mathbf{v}}_{t-1}^* \right\|} \right\| + \left\| \frac{\Sigma_{yy}^{\frac{1}{2}} \tilde{\mathbf{v}}_{t-1}}{\left\| \Sigma_{yy}^{\frac{1}{2}} \tilde{\mathbf{v}}_{t-1} \right\|} - \frac{\Sigma_{yy}^{\frac{1}{2}} \tilde{\mathbf{v}}_{t-1}^*}{\left\| \Sigma_{yy}^{\frac{1}{2}} \tilde{\mathbf{v}}_{t-1}^* \right\|} \right\| \\
& = \left\| \Sigma_{yy}^{\frac{1}{2}} \tilde{\mathbf{v}}_{t-1} \right\| \left| \frac{1}{\left\| \Sigma_{yy}^{\frac{1}{2}} \tilde{\mathbf{v}}_{t-1} \right\|} - \frac{1}{\left\| \Sigma_{yy}^{\frac{1}{2}} \tilde{\mathbf{v}}_{t-1}^* \right\|} \right| + \frac{1}{\left\| \Sigma_{yy}^{\frac{1}{2}} \tilde{\mathbf{v}}_{t-1} \right\|} \left\| \Sigma_{yy}^{\frac{1}{2}} \tilde{\mathbf{v}}_{t-1} - \Sigma_{yy}^{\frac{1}{2}} \tilde{\mathbf{v}}_{t-1}^* \right\| \\
& = \frac{1}{\left\| \Sigma_{yy}^{\frac{1}{2}} \tilde{\mathbf{v}}_{t-1} \right\|} \left| \left\| \Sigma_{yy}^{\frac{1}{2}} \tilde{\mathbf{v}}_{t-1}^* \right\| - \left\| \Sigma_{yy}^{\frac{1}{2}} \tilde{\mathbf{v}}_{t-1} \right\| \right| + \frac{1}{\left\| \Sigma_{yy}^{\frac{1}{2}} \tilde{\mathbf{v}}_{t-1} \right\|} \left\| \Sigma_{yy}^{\frac{1}{2}} \tilde{\mathbf{v}}_{t-1} - \Sigma_{yy}^{\frac{1}{2}} \tilde{\mathbf{v}}_{t-1}^* \right\| \\
& \leq \frac{2}{\left\| \Sigma_{yy}^{\frac{1}{2}} \tilde{\mathbf{v}}_{t-1} \right\|} \left\| \Sigma_{yy}^{\frac{1}{2}} \tilde{\mathbf{v}}_{t-1} - \Sigma_{yy}^{\frac{1}{2}} \tilde{\mathbf{v}}_{t-1}^* \right\| \leq \frac{2\tilde{S}_{t-1}}{\left\| \Sigma_{yy}^{\frac{1}{2}} \tilde{\mathbf{v}}_{t-1} \right\|}. \tag{16}
\end{aligned}$$

We now bound  $\left\| \Sigma_{yy}^{\frac{1}{2}} \tilde{\mathbf{v}}_{t-1}^* \right\|$  from below. Since  $t \geq 2$ , we have

$$\Sigma_{yy}^{\frac{1}{2}} \tilde{\mathbf{v}}_{t-1}^* = \Sigma_{yy}^{\frac{1}{2}} \Sigma_{yy}^{-1} \Sigma_{xy}^\top \mathbf{u}_{t-2}^* = \left( \Sigma_{yy}^{-\frac{1}{2}} \Sigma_{xy}^\top \Sigma_{xx}^{-\frac{1}{2}} \right) \left( \Sigma_{xx}^{\frac{1}{2}} \mathbf{u}_{t-2}^* \right) = \mathbf{T}^\top \left( \Sigma_{xx}^{\frac{1}{2}} \mathbf{u}_{t-2}^* \right).$$

Now,  $\Sigma_{xx}^{\frac{1}{2}} \mathbf{u}_{t-2}^*$  corresponds to  $\phi_{t-2}$  in Algorithm 1, which has unit length and lies in the span of  $\{\mathbf{a}_1, \dots, \mathbf{a}_r\}$ , so we have

$$\left\| \Sigma_{yy}^{\frac{1}{2}} \tilde{\mathbf{v}}_{t-1}^* \right\| = \left\| \mathbf{T}^\top \phi_{t-2} \right\| \geq \rho_r.$$

Combining (14), (15) and (16) gives

$$\begin{aligned}
\left\| \Sigma_{xx}^{\frac{1}{2}} \tilde{\mathbf{u}}_t - \Sigma_{xx}^{\frac{1}{2}} \tilde{\mathbf{u}}_t^* \right\| & \leq \sqrt{2\epsilon} + \frac{2\rho_1}{\rho_r} \cdot \tilde{S}_{t-1} = \sqrt{2\epsilon} + \frac{2\rho_1}{\rho_r} \cdot \sqrt{2\epsilon} \frac{(2\rho_1/\rho_r)^{t-1} - 1}{(2\rho_1/\rho_r) - 1} \\
& = \sqrt{2\epsilon} \frac{(2\rho_1/\rho_r)^t - 1}{(2\rho_1/\rho_r) - 1} = \tilde{S}_t.
\end{aligned}$$

The bound for normalized iterates follows from (16).  $\square$

**Proof of Theorem 2.** We prove the theorem by relating the iterates of inexact power iterations to those of exact power iterations.

Assume the same initialization as in Lemma 6. First observe that

$$\begin{aligned}
(\mathbf{u}_t^\top \Sigma_{xx} \mathbf{u}^*)^2 & = \left( (\mathbf{u}_t^*)^\top \Sigma_{xx} \mathbf{u}^* + (\mathbf{u}_t - \mathbf{u}_t^*)^\top \Sigma_{xx} \mathbf{u}^* \right)^2 \\
& \geq \left( (\mathbf{u}_t^*)^\top \Sigma_{xx} \mathbf{u}^* \right)^2 + 2 \left( (\mathbf{u}_t^*)^\top \Sigma_{xx} \mathbf{u}^* \right) \left( (\mathbf{u}_t - \mathbf{u}_t^*)^\top \Sigma_{xx} \mathbf{u}^* \right) \\
& \geq \left( (\mathbf{u}_t^*)^\top \Sigma_{xx} \mathbf{u}^* \right)^2 - 2 \left| \left( \Sigma_{xx}^{\frac{1}{2}} (\mathbf{u}_t - \mathbf{u}_t^*) \right)^\top \left( \Sigma_{xx}^{\frac{1}{2}} \mathbf{u}^* \right) \right| \\
& \geq \left( (\mathbf{u}_t^*)^\top \Sigma_{xx} \mathbf{u}^* \right)^2 - 2 \left\| \Sigma_{xx}^{\frac{1}{2}} \mathbf{u}_t - \Sigma_{xx}^{\frac{1}{2}} \mathbf{u}_t^* \right\| \tag{17}
\end{aligned}$$

where we have used the fact that  $\left\| \Sigma_{xx}^{\frac{1}{2}} \mathbf{u}_t \right\| = \left\| \Sigma_{xx}^{\frac{1}{2}} \mathbf{u}_t^* \right\| = \left\| \Sigma_{xx}^{\frac{1}{2}} \mathbf{u}^* \right\| = 1$  and the Cauchy-Schwarz inequality in the last two steps.

Applying Theorem 1 with  $T \geq \lceil \frac{\rho_1^2}{\rho_1^2 - \rho_2^2} \log \left( \frac{2}{\mu\eta} \right) \rceil$ , we have that  $\left( (\mathbf{u}_T^*)^\top \Sigma_{xx} \mathbf{u}^* \right)^2 \geq 1 - \eta/2$ . On the other hand, in view of Lemma 6, we have for the specified  $\epsilon$  value in Algorithm 2 that  $\left\| \Sigma_{xx}^{\frac{1}{2}} \mathbf{u}_T - \Sigma_{xx}^{\frac{1}{2}} \mathbf{u}_T^* \right\| \leq S_T = \eta/4$ . Plugging these two bounds into (17) gives the desired result.

The proof for  $\mathbf{v}_T$  is completely analogous.  $\square$

## C SVRG for minimizing $f(\mathbf{u})$

We provide the pseudo-code of SVRG for solving the least squares problem (6) below.

---

SVRG for  $\min_{\mathbf{u}} f(\mathbf{u}) := \frac{1}{N} \sum_{i=1}^N \left( \frac{1}{2} |\mathbf{u}^\top \mathbf{x}_i - \mathbf{v}^\top \mathbf{y}_i|^2 + \frac{\gamma_x}{2} \|\mathbf{u}\|^2 \right)$ .

---

**Input:** Stepsize  $\xi$ .  
Initialize  $\mathbf{u}_{(0)} \in \mathbb{R}^{d_x}$ .  
**for**  $j = 1, 2, \dots, M$  **do**  
     $\mathbf{w}_0 \leftarrow \mathbf{u}_{(j-1)}$   
    Evaluate the batch gradient  $\nabla f(\mathbf{w}_0) = \mathbf{X}(\mathbf{X}^\top \mathbf{w}_0 - \mathbf{Y}^\top \mathbf{v})/N + \gamma_x \mathbf{w}_0$   
    **for**  $t = 1, 2, \dots, m$  **do**  
        Randomly pick  $i_t$  from  $\{1, \dots, N\}$   
         $\mathbf{w}_t \leftarrow \mathbf{w}_{t-1} - \xi \left( (\mathbf{x}_{i_t} \mathbf{x}_{i_t}^\top + \gamma_x \mathbf{I})(\mathbf{w}_{t-1} - \mathbf{w}_0) + \nabla f(\mathbf{w}_0) \right)$   
    **end for**  
     $\mathbf{u}_{(j)} \leftarrow \mathbf{w}_t$  for randomly chosen  $t \in \{1, \dots, m\}$ .  
**end for**  
**Output:**  $\mathbf{u}_{(M)}$  is the approximate solution.

---

## D Initial suboptimality of warm-starts in Algorithm 2

At time step  $t$ , we initialize the least squares problem  $f_t(\mathbf{u})$  with the unnormalized iterate  $\tilde{\mathbf{u}}_{t-1}$  from the previous time step. We now bound the suboptimality of this initialization. Observe that the minimum of  $f_t(\mathbf{u})$  is achieved by  $\bar{\mathbf{u}}_t = \Sigma_{xx}^{-1} \Sigma_{xy} \mathbf{v}_{t-1}$ , and that

$$f_t(\tilde{\mathbf{u}}_{t-1}) - f_t(\bar{\mathbf{u}}_t) = \frac{1}{2} (\tilde{\mathbf{u}}_{t-1} - \bar{\mathbf{u}}_t)^\top \Sigma_{xx} (\tilde{\mathbf{u}}_{t-1} - \bar{\mathbf{u}}_t) = \frac{1}{2} \left\| \Sigma_{xx}^{\frac{1}{2}} \tilde{\mathbf{u}}_{t-1} - \Sigma_{xx}^{\frac{1}{2}} \bar{\mathbf{u}}_t \right\|^2.$$

Applying the triangle inequality, we have for  $t = 1$  that

$$\begin{aligned} \left\| \Sigma_{xx}^{\frac{1}{2}} \tilde{\mathbf{u}}_0 - \Sigma_{xx}^{\frac{1}{2}} \bar{\mathbf{u}}_1 \right\| &\leq \left\| \Sigma_{xx}^{\frac{1}{2}} \tilde{\mathbf{u}}_0 \right\| + \left\| \Sigma_{xx}^{\frac{1}{2}} \bar{\mathbf{u}}_1 \right\| \leq 1 + \left\| \Sigma_{xx}^{\frac{1}{2}} \Sigma_{xx}^{-1} \Sigma_{xy} \mathbf{v}_0 \right\| \\ &= 1 + \left\| \mathbf{T} \Sigma_{yy}^{\frac{1}{2}} \mathbf{v}_0 \right\| \leq 1 + \|\mathbf{T}\| \left\| \Sigma_{yy}^{\frac{1}{2}} \mathbf{v}_0 \right\| = 1 + \rho_1 \leq 2 \end{aligned}$$

where we have used facts that  $\left\| \Sigma_{yy}^{\frac{1}{2}} \tilde{\mathbf{u}}_0 \right\| = \left\| \Sigma_{yy}^{\frac{1}{2}} \mathbf{v}_0 \right\| = 1$  due to the initial normalizations.

And we have for  $t \geq 2$  that

$$\begin{aligned} \left\| \Sigma_{xx}^{\frac{1}{2}} \tilde{\mathbf{u}}_{t-1} - \Sigma_{xx}^{\frac{1}{2}} \bar{\mathbf{u}}_t \right\| &\leq \left\| \Sigma_{xx}^{\frac{1}{2}} \tilde{\mathbf{u}}_{t-1} - \Sigma_{xx}^{\frac{1}{2}} \bar{\mathbf{u}}_{t-1} \right\| + \left\| \Sigma_{xx}^{\frac{1}{2}} \bar{\mathbf{u}}_{t-1} - \Sigma_{xx}^{\frac{1}{2}} \bar{\mathbf{u}}_t \right\| \\ &\leq \sqrt{2\epsilon} + \left\| \Sigma_{xx}^{\frac{1}{2}} \Sigma_{xx}^{-1} \Sigma_{xy} \mathbf{v}_{t-2} - \Sigma_{xx}^{\frac{1}{2}} \Sigma_{xx}^{-1} \Sigma_{xy} \mathbf{v}_{t-1} \right\| \\ &= \sqrt{2\epsilon} + \left\| \mathbf{T} \left( \Sigma_{yy}^{\frac{1}{2}} \mathbf{v}_{t-2} - \Sigma_{yy}^{\frac{1}{2}} \mathbf{v}_{t-1} \right) \right\| \\ &\leq \sqrt{2\epsilon} + \|\mathbf{T}\| \left\| \Sigma_{yy}^{\frac{1}{2}} \mathbf{v}_{t-2} - \Sigma_{yy}^{\frac{1}{2}} \mathbf{v}_{t-1} \right\| \\ &\leq \sqrt{2\epsilon} + 2\rho_1 \leq \sqrt{2\epsilon} + 2 \end{aligned}$$

where we have used the fact that  $\left\| \Sigma_{yy}^{\frac{1}{2}} \mathbf{v}_{t-2} \right\| = \left\| \Sigma_{yy}^{\frac{1}{2}} \mathbf{v}_{t-1} \right\| = 1$  in the last inequality.

Therefore, for all  $t \geq 1$ , the ration between initial suboptimality and required accuracy is

$$\frac{f_t(\tilde{\mathbf{u}}_{t-1}) - f_t(\bar{\mathbf{u}}_t)}{\epsilon} \sim \frac{2}{\epsilon}.$$

## E The shift-and-invert preconditioning (SI) algorithm for CCA

Our shift-and-invert preconditioning (SI) meta-algorithm is detailed in Algorithm 3.

---

**Algorithm 3** The shift-and-invert preconditioning meta-algorithm for CCA.

---

**Input:** Data matrices  $\mathbf{X}, \mathbf{Y}$ , regularization parameters  $(\gamma_x, \gamma_y)$ , an estimate  $\tilde{\Delta}$  for  $\Delta = \rho_1 - \rho_2$ .

Initialize  $\tilde{\mathbf{u}}_0 \in \mathbb{R}^{d_x}, \tilde{\mathbf{v}}_0 \in \mathbb{R}^{d_y}$

$\mathbf{u}_0 \leftarrow \tilde{\mathbf{u}}_0 / \sqrt{\tilde{\mathbf{u}}_0^\top \Sigma_{xx} \tilde{\mathbf{u}}_0}, \quad \mathbf{v}_0 \leftarrow \tilde{\mathbf{v}}_0 / \sqrt{\tilde{\mathbf{v}}_0^\top \Sigma_{yy} \tilde{\mathbf{v}}_0}$

**// Phase I: shift-and-invert preconditioning for eigenvectors of  $\mathbf{M}_\lambda$**

$s \leftarrow 0, \quad \lambda_{(0)} \leftarrow 1 + \tilde{\Delta}$

**repeat**

$s \leftarrow s + 1$

**for**  $t = (s-1)m_1 + 1, \dots, sm_1$  **do**

Optimize the least squares problem

$$\min_{\mathbf{u}, \mathbf{v}} h_t(\mathbf{u}, \mathbf{v}) := \frac{1}{2} [\mathbf{u}^\top \mathbf{v}^\top] \begin{bmatrix} \lambda_{(s-1)} \Sigma_{xx} & -\Sigma_{xy} \\ -\Sigma_{xy}^\top & \lambda_{(s-1)} \Sigma_{yy} \end{bmatrix} \begin{bmatrix} \mathbf{u} \\ \mathbf{v} \end{bmatrix} - \mathbf{u}^\top \Sigma_{xx} \mathbf{u}_{t-1} - \mathbf{v}^\top \Sigma_{yy} \mathbf{v}_{t-1}$$

and output an approximate solution  $(\tilde{\mathbf{u}}_t, \tilde{\mathbf{v}}_t)$  satisfying  $h_t(\tilde{\mathbf{u}}_t, \tilde{\mathbf{v}}_t) \leq \min_{\mathbf{u}, \mathbf{v}} h_t(\mathbf{u}, \mathbf{v}) + \tilde{\epsilon}$ .

Normalization:  $\begin{bmatrix} \mathbf{u}_t \\ \mathbf{v}_t \end{bmatrix} \leftarrow \sqrt{2} \begin{bmatrix} \tilde{\mathbf{u}}_t \\ \tilde{\mathbf{v}}_t \end{bmatrix} / \sqrt{\tilde{\mathbf{u}}_t^\top \Sigma_{xx} \tilde{\mathbf{u}}_t + \tilde{\mathbf{v}}_t^\top \Sigma_{yy} \tilde{\mathbf{v}}_t}$

**end for**

Optimize the least squares problem

$$\min_{\mathbf{w}} l_s(\mathbf{w}) := \frac{1}{2} \mathbf{w}^\top \begin{bmatrix} \lambda_{(s-1)} \Sigma_{xx} & -\Sigma_{xy} \\ -\Sigma_{xy}^\top & \lambda_{(s-1)} \Sigma_{yy} \end{bmatrix} \mathbf{w} - \mathbf{w}^\top \begin{bmatrix} \Sigma_{xx} \mathbf{u}_{sm_1} \\ \Sigma_{yy} \mathbf{v}_{sm_1} \end{bmatrix}$$

and output an approximate solution  $\mathbf{w}_s$  satisfying  $l_s(\mathbf{w}_s) \leq \min_{\mathbf{w}} l_s(\mathbf{w}) + \tilde{\epsilon}$ .

$$\Delta_s \leftarrow \frac{1}{2} \cdot \frac{1}{\frac{1}{2} [\mathbf{u}_{sm_1}^\top \mathbf{v}_{sm_1}^\top] \begin{bmatrix} \Sigma_{xx} & \\ & \Sigma_{yy} \end{bmatrix} \mathbf{w}_s - 2\sqrt{\tilde{\epsilon}/\tilde{\Delta}}}, \quad \lambda_{(s)} \leftarrow \lambda_{(s-1)} - \frac{\Delta_s}{2}$$

**until**  $\Delta_{(s)} \leq \tilde{\Delta}$

$\lambda_{(f)} \leftarrow \lambda_{(s)}$

**for**  $t = sm_1 + 1, sm_1 + 2, \dots, sm_1 + m_2$  **do**

Optimize the least squares problem

$$\min_{\mathbf{u}, \mathbf{v}} h_t(\mathbf{u}, \mathbf{v}) := \frac{1}{2} [\mathbf{u}^\top \mathbf{v}^\top] \begin{bmatrix} \lambda_{(f)} \Sigma_{xx} & -\Sigma_{xy} \\ -\Sigma_{xy}^\top & \lambda_{(f)} \Sigma_{yy} \end{bmatrix} \begin{bmatrix} \mathbf{u} \\ \mathbf{v} \end{bmatrix} - \mathbf{u}^\top \Sigma_{xx} \mathbf{u}_{t-1} - \mathbf{v}^\top \Sigma_{yy} \mathbf{v}_{t-1}$$

and output an approximate solution  $(\tilde{\mathbf{u}}_t, \tilde{\mathbf{v}}_t)$  satisfying  $h_t(\tilde{\mathbf{u}}_t, \tilde{\mathbf{v}}_t) \leq \min_{\mathbf{u}, \mathbf{v}} h_t(\mathbf{u}, \mathbf{v}) + \tilde{\epsilon}$ .

Normalization:  $\begin{bmatrix} \mathbf{u}_t \\ \mathbf{v}_t \end{bmatrix} \leftarrow \sqrt{2} \begin{bmatrix} \tilde{\mathbf{u}}_t \\ \tilde{\mathbf{v}}_t \end{bmatrix} / \sqrt{\tilde{\mathbf{u}}_t^\top \Sigma_{xx} \tilde{\mathbf{u}}_t + \tilde{\mathbf{v}}_t^\top \Sigma_{yy} \tilde{\mathbf{v}}_t}$

**end for**

**// Phase II: Final normalization**

$$T \leftarrow sm_1 + m_2, \quad \hat{\mathbf{u}} \leftarrow \mathbf{u}_T / \sqrt{\mathbf{u}_T^\top \Sigma_{xx} \mathbf{u}_T}, \quad \hat{\mathbf{v}} \leftarrow \mathbf{v}_T / \sqrt{\mathbf{v}_T^\top \Sigma_{yy} \mathbf{v}_T}$$

**Output:**  $(\hat{\mathbf{u}}, \hat{\mathbf{v}})$  is the approximate solution to CCA.

---

## F Proof of Theorem 4

The proof of Theorem 4 closely follows that of [16, Theorem 4.2]. And we will need a few lemmas on the convergence of inexact power iterations.

### F.1 Auxiliary lemmas

Define the condition number of  $\mathbf{M}_\lambda$  as

$$\kappa_\lambda := \frac{\sigma_1(\mathbf{M}_\lambda)}{\sigma_d(\mathbf{M}_\lambda)} = \frac{\frac{1}{\lambda - \rho_1}}{\frac{1}{\lambda + \rho_1}} = \frac{\lambda + \rho_1}{\lambda - \rho_1},$$

and the inverse relative spectral gap of  $\mathbf{M}_\lambda$  as

$$\delta_\lambda := \frac{\sigma_1(\mathbf{M}_\lambda)}{\sigma_1(\mathbf{M}_\lambda) - \sigma_2(\mathbf{M}_\lambda)} = \frac{\frac{1}{\lambda - \rho_1}}{\frac{1}{\lambda - \rho_1} - \frac{1}{\lambda - \rho_2}} = \frac{\lambda - \rho_2}{\rho_1 - \rho_2}.$$

The first lemma states the convergence of exact power iterations, paralleling [16, Theorem A.1].

**Lemma 7** (Convergence of exact power iterations). Fix  $\alpha > 0$ . For the exact power iterations on  $\mathbf{M}_\lambda$  where

$$\begin{aligned} \begin{bmatrix} \tilde{\mathbf{u}}_t^* \\ \tilde{\mathbf{v}}_t^* \end{bmatrix} &\leftarrow \begin{bmatrix} \lambda \Sigma_{xx} & -\Sigma_{xy} \\ -\Sigma_{xy}^\top & \lambda \Sigma_{yy} \end{bmatrix}^{-1} \begin{bmatrix} \Sigma_{xx} & \\ & \Sigma_{yy} \end{bmatrix} \begin{bmatrix} \mathbf{u}_{t-1}^* \\ \mathbf{v}_{t-1}^* \end{bmatrix}, \\ \begin{bmatrix} \mathbf{u}_t^* \\ \mathbf{v}_t^* \end{bmatrix} &\leftarrow \sqrt{2} \begin{bmatrix} \tilde{\mathbf{u}}_t^* \\ \tilde{\mathbf{v}}_t^* \end{bmatrix} \Big/ \sqrt{(\tilde{\mathbf{u}}_t^*)^\top \Sigma_{xx} \tilde{\mathbf{u}}_t^* + (\tilde{\mathbf{v}}_t^*)^\top \Sigma_{yy} \tilde{\mathbf{v}}_t^*}, \quad \text{for } t = 1, \dots, m, \end{aligned}$$

and  $\mu' := \frac{1}{4} ((\mathbf{u}_0^*)^\top \Sigma_{xx} \mathbf{u}^* + (\mathbf{v}_0^*)^\top \Sigma_{yy} \mathbf{v}^*)^2 > 0$ , we have

- (crude regime)

$$\frac{1}{2} \left[ (\mathbf{u}_t^*)^\top \Sigma_{xx}^{\frac{1}{2}}, (\mathbf{v}_t^*)^\top \Sigma_{yy}^{\frac{1}{2}} \right] \mathbf{M}_\lambda \begin{bmatrix} \Sigma_{xx}^{\frac{1}{2}} \mathbf{u}_t^* \\ \Sigma_{yy}^{\frac{1}{2}} \mathbf{v}_t^* \end{bmatrix} \geq (1 - \alpha) \cdot \sigma_1(\mathbf{M}_\lambda)$$

for  $t \geq \lceil \frac{1}{\alpha} \log \left( \frac{2}{\mu' \alpha} \right) \rceil$ ,

- (accurate regime)

$$\frac{1}{4} ((\mathbf{u}_t^*)^\top \Sigma_{xx} \mathbf{u}^* + (\mathbf{v}_t^*)^\top \Sigma_{yy} \mathbf{v}^*)^2 \geq 1 - \alpha$$

for  $t \geq \lceil \frac{\delta_\lambda}{2} \log \left( \frac{1}{\mu' \alpha} \right) \rceil$ .

The second lemma bounds the distances between the iterates of inexact and exact power iterations, paralleling [16, Lemma 4.1]. Recall that the  $(\tilde{\mathbf{u}}_t, \tilde{\mathbf{v}}_t)$  in Algorithm 3 satisfies  $h_t(\tilde{\mathbf{u}}_t, \tilde{\mathbf{v}}_t) \leq \min_{\mathbf{u}, \mathbf{v}} h_t(\mathbf{u}, \mathbf{v}) + \tilde{\epsilon}$ . Let  $(\bar{\mathbf{u}}_t, \bar{\mathbf{v}}_t)$  be the exact minimum of  $h_t$ . Then we have

$$\begin{aligned} &h_t(\tilde{\mathbf{u}}_t, \tilde{\mathbf{v}}_t) - h_t(\bar{\mathbf{u}}_t, \bar{\mathbf{v}}_t) \\ &= \frac{1}{2} [(\tilde{\mathbf{u}}_t - \bar{\mathbf{u}}_t)^\top \quad (\tilde{\mathbf{v}}_t - \bar{\mathbf{v}}_t)^\top] \begin{bmatrix} \lambda \Sigma_{xx} & -\Sigma_{xy} \\ -\Sigma_{xy}^\top & \lambda \Sigma_{yy} \end{bmatrix} \begin{bmatrix} \tilde{\mathbf{u}}_t - \bar{\mathbf{u}}_t \\ \tilde{\mathbf{v}}_t - \bar{\mathbf{v}}_t \end{bmatrix} \\ &= \frac{1}{2} [(\tilde{\mathbf{u}}_t - \bar{\mathbf{u}}_t)^\top \quad (\tilde{\mathbf{v}}_t - \bar{\mathbf{v}}_t)^\top] \begin{bmatrix} \lambda \Sigma_{xx} & -\Sigma_{xy} \\ -\Sigma_{xy}^\top & \lambda \Sigma_{yy} \end{bmatrix} \begin{bmatrix} \tilde{\mathbf{u}}_t - \bar{\mathbf{u}}_t \\ \tilde{\mathbf{v}}_t - \bar{\mathbf{v}}_t \end{bmatrix} \\ &= \frac{1}{2} [(\tilde{\mathbf{u}}_t - \bar{\mathbf{u}}_t)^\top \Sigma_{xx}^{\frac{1}{2}} \quad (\tilde{\mathbf{v}}_t - \bar{\mathbf{v}}_t)^\top \Sigma_{yy}^{\frac{1}{2}}] \begin{bmatrix} \lambda \mathbf{I} & -\mathbf{T} \\ -\mathbf{T}^\top & \lambda \mathbf{I} \end{bmatrix} \begin{bmatrix} \Sigma_{xx}^{\frac{1}{2}} (\tilde{\mathbf{u}}_t - \bar{\mathbf{u}}_t) \\ \Sigma_{yy}^{\frac{1}{2}} (\tilde{\mathbf{v}}_t - \bar{\mathbf{v}}_t) \end{bmatrix} \\ &= \frac{1}{2} [(\tilde{\mathbf{u}}_t - \bar{\mathbf{u}}_t)^\top \Sigma_{xx}^{\frac{1}{2}} \quad (\tilde{\mathbf{v}}_t - \bar{\mathbf{v}}_t)^\top \Sigma_{yy}^{\frac{1}{2}}] \mathbf{M}_\lambda^{-1} \begin{bmatrix} \Sigma_{xx}^{\frac{1}{2}} (\tilde{\mathbf{u}}_t - \bar{\mathbf{u}}_t) \\ \Sigma_{yy}^{\frac{1}{2}} (\tilde{\mathbf{v}}_t - \bar{\mathbf{v}}_t) \end{bmatrix} \leq \tilde{\epsilon}. \end{aligned} \tag{18}$$

**Lemma 8** (Power iterations with inexact matrix-vector multiplications). Consider the inexact power iterations on  $\mathbf{M}_\lambda$  where

$$\begin{aligned} &(\tilde{\mathbf{u}}_t, \tilde{\mathbf{v}}_t) \text{ satisfies } (18), \\ &\begin{bmatrix} \mathbf{u}_t \\ \mathbf{v}_t \end{bmatrix} \leftarrow \sqrt{2} \begin{bmatrix} \tilde{\mathbf{u}}_t \\ \tilde{\mathbf{v}}_t \end{bmatrix} \Big/ \sqrt{\tilde{\mathbf{u}}_t^\top \Sigma_{xx} \tilde{\mathbf{u}}_t + \tilde{\mathbf{v}}_t^\top \Sigma_{yy} \tilde{\mathbf{v}}_t}, \quad \text{for } t = 1, \dots, m. \end{aligned}$$

Compare these iterates with those of the exact power iterations described in Lemma 7 using the same initialization  $\tilde{\mathbf{u}}_0 = \tilde{\mathbf{u}}_0^*$ ,  $\tilde{\mathbf{v}}_0 = \tilde{\mathbf{v}}_0^*$ . Then, for  $t \geq 0$ , the unnormalized iterates satisfy

$$\left\| \frac{1}{\sqrt{2}} \begin{bmatrix} \Sigma_{xx}^{\frac{1}{2}} \tilde{\mathbf{u}}_t \\ \Sigma_{yy}^{\frac{1}{2}} \tilde{\mathbf{v}}_t \end{bmatrix} - \frac{1}{\sqrt{2}} \begin{bmatrix} \Sigma_{xx}^{\frac{1}{2}} \tilde{\mathbf{u}}_t^* \\ \Sigma_{yy}^{\frac{1}{2}} \tilde{\mathbf{v}}_t^* \end{bmatrix} \right\| \leq \tilde{R}_t$$

where

$$\tilde{R}_t := \sqrt{\sigma_1(\mathbf{M}_\lambda)} \cdot \tilde{\epsilon} \cdot \frac{(2\kappa_\lambda)^t - 1}{2\kappa_\lambda - 1},$$

while the normalized iterates satisfy

$$\left\| \frac{1}{\sqrt{2}} \begin{bmatrix} \Sigma_{xx}^{\frac{1}{2}} \mathbf{u}_t \\ \Sigma_{yy}^{\frac{1}{2}} \mathbf{v}_t \end{bmatrix} - \frac{1}{\sqrt{2}} \begin{bmatrix} \Sigma_{xx}^{\frac{1}{2}} \mathbf{u}_t^* \\ \Sigma_{yy}^{\frac{1}{2}} \mathbf{v}_t^* \end{bmatrix} \right\| \leq R_t := \frac{2\tilde{R}_t}{\sigma_d(\mathbf{M}_\lambda)}.$$

The third lemma states the convergence of inexact power iterations, paralleling [16, Theorem 4.1].

**Lemma 9** (Convergence of inexact power iterations). Fix  $\alpha > 0$ . Consider the inexact power iterations described in Lemma 8.

- (crude regime) Let  $t_1 = \lceil \frac{2}{\alpha} \log \left( \frac{4}{\mu' \alpha} \right) \rceil$ . Fix  $T \geq t_1$ , and set  $\tilde{\epsilon}(T) = \frac{\alpha^2 \cdot \sigma_d(\mathbf{M}_\lambda)}{64\kappa_\lambda} \left( \frac{2\kappa_\lambda - 1}{(2\kappa_\lambda)^T - 1} \right)^2$ . Then we have
$$\frac{1}{2} \left[ \mathbf{u}_T^\top \Sigma_{xx}^{\frac{1}{2}}, \mathbf{v}_T^\top \Sigma_{yy}^{\frac{1}{2}} \right] \mathbf{M}_\lambda \begin{bmatrix} \Sigma_{xx}^{\frac{1}{2}} \mathbf{u}_T \\ \Sigma_{yy}^{\frac{1}{2}} \mathbf{v}_T \end{bmatrix} \geq (1 - \alpha) \cdot \sigma_1(\mathbf{M}_\lambda).$$
- (accurate regime) Let  $t_2 = \lceil \frac{\delta(\mathbf{M}_\lambda)}{2} \log \left( \frac{2}{\mu' \alpha} \right) \rceil$ . Fix  $T \geq t_2$ , and set  $\tilde{\epsilon}(T) = \frac{\alpha^2 \cdot \sigma_d(\mathbf{M}_\lambda)}{64\kappa_\lambda} \left( \frac{2\kappa_\lambda - 1}{(2\kappa_\lambda)^T - 1} \right)^2$ . Then we have
$$\frac{1}{4} (\mathbf{u}_T^\top \Sigma_{xx} \mathbf{u}^* + \mathbf{v}_T^\top \Sigma_{yy} \mathbf{v}^*)^2 \geq 1 - \alpha.$$

For brevity, let us define the following short-hands:

$$\begin{aligned} \tilde{\mathbf{r}}_t &= \frac{1}{\sqrt{2}} \begin{bmatrix} \Sigma_{xx}^{\frac{1}{2}} \tilde{\mathbf{u}}_t \\ \Sigma_{yy}^{\frac{1}{2}} \tilde{\mathbf{v}}_t \end{bmatrix}, & \mathbf{r}_t &= \frac{1}{\sqrt{2}} \begin{bmatrix} \Sigma_{xx}^{\frac{1}{2}} \mathbf{u}_t \\ \Sigma_{yy}^{\frac{1}{2}} \mathbf{v}_t \end{bmatrix}, & \bar{\mathbf{r}}_t &= \frac{1}{\sqrt{2}} \begin{bmatrix} \Sigma_{xx}^{\frac{1}{2}} \bar{\mathbf{u}}_t \\ \Sigma_{yy}^{\frac{1}{2}} \bar{\mathbf{v}}_t \end{bmatrix}, \\ \tilde{\mathbf{r}}_t^* &= \frac{1}{\sqrt{2}} \begin{bmatrix} \Sigma_{xx}^{\frac{1}{2}} \tilde{\mathbf{u}}_t^* \\ \Sigma_{yy}^{\frac{1}{2}} \tilde{\mathbf{v}}_t^* \end{bmatrix}, & \mathbf{r}_t^* &= \frac{1}{\sqrt{2}} \begin{bmatrix} \Sigma_{xx}^{\frac{1}{2}} \mathbf{u}_t^* \\ \Sigma_{yy}^{\frac{1}{2}} \mathbf{v}_t^* \end{bmatrix}, & \mathbf{r}^* &= \frac{1}{\sqrt{2}} \begin{bmatrix} \Sigma_{xx}^{\frac{1}{2}} \mathbf{u}^* \\ \Sigma_{yy}^{\frac{1}{2}} \mathbf{v}^* \end{bmatrix}. \end{aligned}$$

All these vectors are in  $\mathbb{R}^d$  and have length 1.

Observe that the matrix-vector multiplication (8) is equivalent to

$$\begin{bmatrix} \Sigma_{xx}^{\frac{1}{2}} \tilde{\mathbf{u}}_t \\ \Sigma_{yy}^{\frac{1}{2}} \tilde{\mathbf{v}}_t \end{bmatrix} \leftarrow \begin{bmatrix} \Sigma_{xx}^{\frac{1}{2}} & \\ & \Sigma_{yy}^{\frac{1}{2}} \end{bmatrix} \begin{bmatrix} \lambda \Sigma_{xx} & -\Sigma_{xy} \\ -\Sigma_{xy}^\top & \lambda \Sigma_{yy} \end{bmatrix}^{-1} \begin{bmatrix} \Sigma_{xx}^{\frac{1}{2}} & \\ & \Sigma_{yy}^{\frac{1}{2}} \end{bmatrix} \begin{bmatrix} \Sigma_{xx}^{\frac{1}{2}} \mathbf{u}_{t-1} \\ \Sigma_{yy}^{\frac{1}{2}} \mathbf{v}_{t-1} \end{bmatrix},$$

and

$$\begin{aligned} & \begin{bmatrix} \Sigma_{xx}^{\frac{1}{2}} & \\ & \Sigma_{yy}^{\frac{1}{2}} \end{bmatrix} \begin{bmatrix} \lambda \Sigma_{xx} & -\Sigma_{xy} \\ -\Sigma_{xy}^\top & \lambda \Sigma_{yy} \end{bmatrix}^{-1} \begin{bmatrix} \Sigma_{xx}^{\frac{1}{2}} & \\ & \Sigma_{yy}^{\frac{1}{2}} \end{bmatrix} \\ &= \begin{bmatrix} \Sigma_{xx}^{-\frac{1}{2}} & \\ & \Sigma_{yy}^{-\frac{1}{2}} \end{bmatrix}^{-1} \begin{bmatrix} \lambda \Sigma_{xx} & -\Sigma_{xy} \\ -\Sigma_{xy}^\top & \lambda \Sigma_{yy} \end{bmatrix}^{-1} \begin{bmatrix} \Sigma_{xx}^{-\frac{1}{2}} & \\ & \Sigma_{yy}^{-\frac{1}{2}} \end{bmatrix}^{-1} \\ &= \left( \begin{bmatrix} \Sigma_{xx}^{-\frac{1}{2}} & \\ & \Sigma_{yy}^{-\frac{1}{2}} \end{bmatrix} \begin{bmatrix} \lambda \Sigma_{xx} & -\Sigma_{xy} \\ -\Sigma_{xy}^\top & \lambda \Sigma_{yy} \end{bmatrix} \begin{bmatrix} \Sigma_{xx}^{-\frac{1}{2}} & \\ & \Sigma_{yy}^{-\frac{1}{2}} \end{bmatrix} \right)^{-1} \\ &= \begin{bmatrix} \lambda \mathbf{I} & -\Sigma_{xx}^{-\frac{1}{2}} \Sigma_{xy} \Sigma_{yy}^{-\frac{1}{2}} \\ -\Sigma_{yy}^{-\frac{1}{2}} \Sigma_{xy}^\top \Sigma_{xx}^{-\frac{1}{2}} & \lambda \mathbf{I} \end{bmatrix}^{-1} \\ &= \mathbf{M}_\lambda. \end{aligned}$$

Then the updates for exact power iterations can be written as

$$\tilde{\mathbf{r}}_t^* \leftarrow \mathbf{M}_\lambda \mathbf{r}_{t-1}^*, \quad \mathbf{r}_t^* \leftarrow \tilde{\mathbf{r}}_t^* / \|\tilde{\mathbf{r}}_t^*\|, \quad t = 1, \dots,$$

and the updates for inexact power iterations can be written as

$$\tilde{\mathbf{r}}_t \approx \mathbf{M}_\lambda \mathbf{r}_{t-1}, \quad \mathbf{r}_t \leftarrow \tilde{\mathbf{r}}_t / \|\tilde{\mathbf{r}}_t\|, \quad t = 1, \dots$$

Note we have according to (18) that

$$\tilde{\epsilon} \geq (\tilde{\mathbf{r}}_t - \bar{\mathbf{r}}_t)^\top \mathbf{M}_\lambda^{-1} (\tilde{\mathbf{r}}_t - \bar{\mathbf{r}}_t) \geq \sigma_d(\mathbf{M}_\lambda^{-1}) \cdot \|\tilde{\mathbf{r}}_t - \bar{\mathbf{r}}_t\|^2 = \frac{1}{\sigma_1(\mathbf{M}_\lambda)} \cdot \|\tilde{\mathbf{r}}_t - \bar{\mathbf{r}}_t\|^2$$

or equivalently

$$\|\tilde{\mathbf{r}}_t - \bar{\mathbf{r}}_t\| \leq \sqrt{\sigma_1(\mathbf{M}_\lambda) \cdot \epsilon}. \quad (19)$$

**Proof of Lemma 7.** Recall that the eigenvectors of  $\mathbf{M}_\lambda$  are:

$$\lambda_1 := \frac{1}{\lambda - \rho_1} > \lambda_2 := \frac{1}{\lambda - \rho_2} \geq \dots \geq \lambda_{d-1} := \frac{1}{\lambda + \rho_2} \geq \lambda_d := \frac{1}{\lambda + \rho_1},$$

with corresponding eigenvectors

$$\mathbf{e}_1 = \mathbf{r}^* = \frac{1}{\sqrt{2}} \begin{bmatrix} \mathbf{a}_1 \\ \mathbf{b}_1 \end{bmatrix}, \mathbf{e}_2 = \frac{1}{\sqrt{2}} \begin{bmatrix} \mathbf{a}_2 \\ \mathbf{b}_2 \end{bmatrix}, \dots, \mathbf{e}_{d-1} = \frac{1}{\sqrt{2}} \begin{bmatrix} \mathbf{a}_2 \\ -\mathbf{b}_2 \end{bmatrix}, \mathbf{e}_d = \frac{1}{\sqrt{2}} \begin{bmatrix} \mathbf{a}_1 \\ -\mathbf{b}_1 \end{bmatrix}.$$

By the update rule of exact power iterations, it holds that for  $i = 1, \dots, d$  that

$$\begin{aligned} (\mathbf{e}_i^\top \mathbf{r}_t^*)^2 &= \frac{(\mathbf{e}_i^\top \mathbf{M}_\lambda^t \mathbf{r}_0^*)^2}{\|\mathbf{M}_\lambda^t \mathbf{r}_0^*\|^2} = \frac{(\mathbf{e}_i^\top \mathbf{M}_\lambda^t \mathbf{r}_0^*)^2}{(\mathbf{r}_0^*)^\top \mathbf{M}_\lambda^{2t} \mathbf{r}_0^*} = \frac{(\lambda_i^t \mathbf{e}_i^\top \mathbf{r}_0^*)^2}{\sum_{j=1}^d \lambda_j^{2t} (\mathbf{e}_j^\top \mathbf{r}_0^*)^2} = \frac{(\mathbf{e}_i^\top \mathbf{r}_0^*)^2}{\sum_{j=1}^d \left(\frac{\lambda_j}{\lambda_i}\right)^{2t} (\mathbf{e}_j^\top \mathbf{r}_0^*)^2} \\ &\leq \frac{(\mathbf{e}_i^\top \mathbf{r}_0^*)^2}{\left(\frac{\lambda_1}{\lambda_i}\right)^{2t} (\mathbf{e}_1^\top \mathbf{r}_0^*)^2} = \frac{(\mathbf{e}_i^\top \mathbf{r}_0^*)^2}{(\mathbf{e}_1^\top \mathbf{r}_0^*)^2} \left(\frac{\lambda_i}{\lambda_1}\right)^{2t} = \frac{(\mathbf{e}_i^\top \mathbf{r}_0^*)^2}{\tilde{\mu}} \left(1 - \frac{\lambda_1 - \lambda_i}{\lambda_1}\right)^{2t} \\ &\leq \frac{(\mathbf{e}_i^\top \mathbf{r}_0^*)^2}{\tilde{\mu}} \cdot \exp\left(-2 \frac{\lambda_1 - \lambda_i}{\lambda_1} t\right). \end{aligned}$$

Given  $\delta \in (0, 1)$ , define  $S(\delta) = \{i : \lambda_i > (1 - \delta)\lambda_1\}$ . For  $\delta_1, \delta_2 \in (0, 1)$ , define

$$T(\delta_1, \delta_2) := \lceil \frac{1}{2\delta_1} \log\left(\frac{1}{\tilde{\mu}\delta_2}\right) \rceil.$$

For all  $i \notin S(\delta_1)$ , when  $t > T(\delta_1, \delta_2)$ , it holds that  $(\mathbf{e}_i^\top \mathbf{r}_t^*)^2 \leq \delta_2 (\mathbf{e}_i^\top \mathbf{r}_0^*)^2$ , and thus in particular  $\sum_{i \in S(\alpha/2)} (\mathbf{e}_i^\top \mathbf{r}_t^*)^2 \geq 1 - \delta_2$ .

Part one (crude regime) of the lemma now follows by noticing that, by setting  $\delta_1 = \delta_2 = \frac{\alpha}{2}$  we have that for  $t \geq T\left(\frac{\alpha}{2}, \frac{\alpha}{2}\right)$ , it holds that

$$(\mathbf{r}_t^*)^\top \mathbf{M}_\lambda \mathbf{r}_t^* = \sum_{i=1}^d \lambda_i (\mathbf{e}_i^\top \mathbf{r}_t^*)^2 \geq \sum_{i \in S(\alpha/2)} \left(1 - \frac{\alpha}{2}\right) \lambda_i (\mathbf{e}_i^\top \mathbf{r}_t^*)^2 \geq \left(1 - \frac{\alpha}{2}\right)^2 \lambda_1 \geq (1 - \alpha) \lambda_1.$$

For the second part (accurate regime) of the lemma, note that  $S\left(\frac{\lambda_1 - \lambda_2}{\lambda_1}\right) = \{1\}$ . Thus for all  $t \geq T\left(\frac{\lambda_1 - \lambda_2}{\lambda_1}, \alpha\right)$ , it holds that  $(\mathbf{e}_1^\top \mathbf{r}_t^*)^2 \geq 1 - \alpha$ .

□

**Proof of Lemma 8.** We prove the bound for unnormalized iterates by induction. The case for  $t = 1$  holds trivially. For  $t \geq 2$ , we can bound the error of the unnormalized iterates using the exact solution to  $\tilde{h}_t$ :

$$\|\tilde{\mathbf{r}}_t - \tilde{\mathbf{r}}_t^*\| \leq \|\tilde{\mathbf{r}}_t - \bar{\mathbf{r}}_t\| + \|\bar{\mathbf{r}}_t - \tilde{\mathbf{r}}_t^*\|. \quad (20)$$

The second term of (20) is concerned with the error due to inexact target in the least squares problem

$h_t(\mathbf{u}, \mathbf{v})$  as  $\begin{bmatrix} \mathbf{u}_{t-1} \\ \mathbf{v}_{t-1} \end{bmatrix}$  is different from  $\begin{bmatrix} \mathbf{u}_{t-1}^* \\ \mathbf{v}_{t-1}^* \end{bmatrix}$ . We can bound this term as

$$\begin{aligned} \|\bar{\mathbf{r}}_t - \tilde{\mathbf{r}}_t^*\| &= \|\mathbf{M}_\lambda \mathbf{r}_{t-1} - \mathbf{M}_\lambda \mathbf{r}_{t-1}^*\| \leq \|\mathbf{M}_\lambda\| \cdot \|\mathbf{r}_{t-1} - \mathbf{r}_{t-1}^*\| \\ &= \sigma_1(\mathbf{M}_\lambda) \cdot \|\mathbf{r}_{t-1} - \mathbf{r}_{t-1}^*\|. \end{aligned} \quad (21)$$

In view of the update rule of our algorithm and the triangle inequality, we have

$$\begin{aligned} &\|\mathbf{r}_{t-1} - \mathbf{r}_{t-1}^*\| \\ &\leq \left\| \frac{\tilde{\mathbf{r}}_{t-1}}{\|\tilde{\mathbf{r}}_{t-1}\|} - \frac{\tilde{\mathbf{r}}_{t-1}}{\|\tilde{\mathbf{r}}_{t-1}^*\|} \right\| + \left\| \frac{\tilde{\mathbf{r}}_{t-1}}{\|\tilde{\mathbf{r}}_{t-1}^*\|} - \frac{\tilde{\mathbf{r}}_{t-1}^*}{\|\tilde{\mathbf{r}}_{t-1}^*\|} \right\| \\ &= \|\tilde{\mathbf{r}}_{t-1}\| \left| \frac{1}{\|\tilde{\mathbf{r}}_{t-1}\|} - \frac{1}{\|\tilde{\mathbf{r}}_{t-1}^*\|} \right| + \frac{1}{\|\tilde{\mathbf{r}}_{t-1}^*\|} \|\tilde{\mathbf{r}}_{t-1} - \tilde{\mathbf{r}}_{t-1}^*\| \\ &= \frac{1}{\|\tilde{\mathbf{r}}_{t-1}^*\|} \left| \|\tilde{\mathbf{r}}_{t-1}^*\| - \|\tilde{\mathbf{r}}_{t-1}\| \right| + \frac{1}{\|\tilde{\mathbf{r}}_{t-1}^*\|} \|\tilde{\mathbf{r}}_{t-1} - \tilde{\mathbf{r}}_{t-1}^*\| \\ &\leq \frac{2}{\|\tilde{\mathbf{r}}_{t-1}^*\|} \|\tilde{\mathbf{r}}_{t-1} - \tilde{\mathbf{r}}_{t-1}^*\| \leq \frac{2\tilde{R}_{t-1}}{\|\tilde{\mathbf{r}}_{t-1}^*\|}. \end{aligned} \quad (22)$$

For  $t \geq 2$ , we have  $\tilde{\mathbf{r}}_{t-1}^* = \mathbf{M}_\lambda \mathbf{r}_{t-2}^*$  and  $\|\mathbf{r}_{t-2}^*\| = 1$ , and thus

$$\|\tilde{\mathbf{r}}_{t-1}^*\| \geq \sigma_d(\mathbf{M}_\lambda).$$

Combining (20), (21) and (22) gives

$$\|\tilde{\mathbf{r}}_t - \tilde{\mathbf{r}}_t^*\| \leq \sqrt{\sigma_1(\mathbf{M}_\lambda) \cdot \epsilon} + 2\kappa_\lambda \tilde{R}_{t-1} = \tilde{R}_t.$$

The bound for normalized iterates follows from (22).  $\square$

**Proof of Lemma 9.** For the first item (crude regime), observe that

$$\mathbf{r}_t^\top \mathbf{M}_\lambda \mathbf{r}_t = (\mathbf{r}_t^*)^\top \mathbf{M}_\lambda \mathbf{r}_t^* + ((\mathbf{r}_t^*)^\top \mathbf{M}_\lambda \mathbf{r}_t^* - \mathbf{r}_t^\top \mathbf{M}_\lambda \mathbf{r}_t), \quad (23)$$

and that

$$\begin{aligned} |(\mathbf{r}_t^*)^\top \mathbf{M}_\lambda (\mathbf{r}_t^*) - \mathbf{r}_t^\top \mathbf{M}_\lambda \mathbf{r}_t| &= \left| \left( \mathbf{M}_\lambda^{\frac{1}{2}} \mathbf{r}_t^* + \mathbf{M}_\lambda^{\frac{1}{2}} \mathbf{r}_t \right)^\top \left( \mathbf{M}_\lambda^{\frac{1}{2}} \mathbf{r}_t^* - \mathbf{M}_\lambda^{\frac{1}{2}} \mathbf{r}_t \right) \right| \\ &\leq \left\| \mathbf{M}_\lambda^{\frac{1}{2}} \mathbf{r}_t^* + \mathbf{M}_\lambda^{\frac{1}{2}} \mathbf{r}_t \right\| \left\| \mathbf{M}_\lambda^{\frac{1}{2}} \mathbf{r}_t^* - \mathbf{M}_\lambda^{\frac{1}{2}} \mathbf{r}_t \right\| \\ &\leq \left\| \mathbf{M}_\lambda^{\frac{1}{2}} \right\| \|\mathbf{r}_t^* + \mathbf{r}_t\| \left\| \mathbf{M}_\lambda^{\frac{1}{2}} \right\| \|\mathbf{r}_t^* - \mathbf{r}_t\| \\ &\leq \|\mathbf{M}_\lambda\| (\|\mathbf{r}_t^*\| + \|\mathbf{r}_t\|) \|\mathbf{r}_t^* - \mathbf{r}_t\| \\ &= 2\sigma_1(\mathbf{M}_\lambda) \cdot \|\mathbf{r}_t^* - \mathbf{r}_t\|. \end{aligned}$$

Our choices of  $T$  and  $\tilde{\epsilon}$  make sure that  $(\mathbf{r}_T^*)^\top \mathbf{M}_\lambda \mathbf{r}_T^* \geq (1 - \frac{\alpha}{2}) \cdot \sigma_1(\mathbf{M}_\lambda)$  by Lemma 7 and that  $\|\mathbf{r}_T^* - \mathbf{r}_T\| \leq R_T = \alpha/4$  by Lemma 8. Continuing from (23), we have

$$\mathbf{r}_T^\top \mathbf{M}_\lambda \mathbf{r}_T \geq \left(1 - \frac{\alpha}{2}\right) \cdot \sigma_1(\mathbf{M}_\lambda) - \frac{\alpha}{2} \cdot \sigma_1(\mathbf{M}_\lambda) = (1 - \alpha) \cdot \sigma_1(\mathbf{M}_\lambda).$$

For the second item (accurate regime), observe that

$$(\mathbf{r}_t^\top \mathbf{r}^*)^2 = ((\mathbf{r}_t^*)^\top \mathbf{r}^* + (\mathbf{r}_t - \mathbf{r}_t^*)^\top \mathbf{r}^*)^2 \geq ((\mathbf{r}_t^*)^\top \mathbf{r}^*)^2 - 2\|\mathbf{r}_t - \mathbf{r}_t^*\|. \quad (24)$$

Our choices of  $T$  and  $\tilde{\epsilon}$  make sure that  $((\mathbf{r}_T^*)^\top \mathbf{r}^*)^2 \geq 1 - \frac{\alpha}{2}$  by Lemma 7 and that  $\|\mathbf{r}_T^* - \mathbf{r}_T\| \leq R_T = \alpha/4$  by Lemma 8. Continuing from (24), we have

$$(\mathbf{r}_T^\top \mathbf{r}^*)^2 \geq 1 - \frac{\alpha}{2} - \frac{\alpha}{2} = 1 - \alpha.$$

$\square$

## F.2 Iteration complexity of Algorithm 3

Observe that, the **for** loops within the **repeat-until** loop, as well as the final **for** loop in Algorithm 3 are running inexact power iterations on  $\mathbf{M}_{\lambda_{(s)}}$  and  $\mathbf{M}_{\lambda_{(f)}}$  for  $m_1$  and  $m_2$  inexact matrix-vector multiplication respectively. And the convergence of inexact power iterations is provided by Lemma 8.

For each iteration of the **repeat-until** loop, we work in the crude regime and only require  $\mathbf{r}_{sm_1}$  to give a constant multiple estimate of  $\mathbf{M}_{\lambda_{(s)}}$ . The lemma below shows an important property of  $\Delta_s$  which is used to locate  $\lambda_{(f)}$ , and the number of iterations needed to reach  $\lambda_{(f)}$ .

**Lemma 10** (Iteration complexity of the **repeat-until** loop in Algorithm 3). Suppose that  $\tilde{\Delta} \in [c_1\Delta, c_2\Delta]$  where  $c_2 \leq 1$ . Set  $m_1 = \lceil 8 \log \left( \frac{16}{\mu'} \right) \rceil$  and  $\tilde{\epsilon} \leq \frac{1}{3084} \left( \frac{\tilde{\Delta}}{18} \right)^{m_1-1}$  in Algorithm 3. Then for all  $s \geq 1$  it holds that

$$\frac{1}{2}(\lambda_{(s-1)} - \rho_1) \leq \Delta_s \leq \lambda_{(s-1)} - \rho_1,$$

upon exiting this loop, the  $\lambda_{(f)}$  satisfies

$$\rho_1 + \frac{\tilde{\Delta}}{4} \leq \lambda_{(f)} \leq \rho_1 + \frac{3\tilde{\Delta}}{2}, \quad (25)$$

and the number of iterations run by the **repeat-until** loop is  $\log \left( \frac{1}{\Delta} \right)$ .

*Proof.* Let  $\bar{\sigma}$  be an upper bound of all  $\sigma_1(\mathbf{M}_{\lambda_{(s)}})$  used in the **repeat-until** loop, i.e.,

$$\bar{\sigma} \geq \sigma_1(\mathbf{M}_{\lambda_{(s)}}), \quad s = 1, 2, \dots$$

And suppose for now that throughout the loop,  $\tilde{\epsilon}$  satisfies

$$\sqrt{\bar{\sigma}\tilde{\epsilon}} \leq \frac{\sigma_1(\mathbf{M}_{\lambda_{(s-1)}})}{8}. \quad (26)$$

Set  $\alpha = \frac{1}{4}$  in Lemma 8 (crude regime), and with our choice of  $m_1$  and

$$\tilde{\epsilon} \leq \frac{\sigma_d(\mathbf{M}_{\lambda_{(s)}})}{1024\kappa_{\lambda_{(s)}}} \left( \frac{2\kappa_{\lambda_{(s)}} - 1}{(2\kappa_{\lambda_{(s)}})^{m_1} - 1} \right)^2, \quad (27)$$

we have

$$\mathbf{r}_{sm_1}^\top \mathbf{M}_{\lambda_{(s-1)}} \mathbf{r}_{sm_1} \geq \frac{3}{4} \sigma_1(\mathbf{M}_{\lambda_{(s-1)}}). \quad (28)$$

In view of the definition of the vector  $\mathbf{w}_s$  in Algorithm 3, and following the same argument in (18), we have

$$\left\| \frac{\mathbf{z}_s}{\sqrt{2}} - \mathbf{M}_{\lambda_{(s-1)}} \mathbf{r}_{sm_1} \right\| \leq \sqrt{\sigma_1(\mathbf{M}_{\lambda_{(s-1)}}) \cdot \tilde{\epsilon}}$$

$$\text{where } \mathbf{z}_s = \begin{bmatrix} \Sigma_{xx}^{\frac{1}{2}} & \\ & \Sigma_{yy}^{\frac{1}{2}} \end{bmatrix} \mathbf{w}_s.$$

Then for every iteration of the **repeat-until** loop, it holds that

$$\begin{aligned} & \frac{1}{2} [\mathbf{u}_{sm_1}^\top \mathbf{v}_{sm_1}^\top] \begin{bmatrix} \Sigma_{xx} & \\ & \Sigma_{yy} \end{bmatrix} \mathbf{w}_s \\ &= \mathbf{r}_{sm_1}^\top \left( \frac{\mathbf{z}_s}{\sqrt{2}} \right) = \mathbf{r}_{sm_1}^\top \mathbf{M}_{\lambda_{(s-1)}} \mathbf{r}_{sm_1} + \mathbf{r}_{sm_1}^\top \left( \frac{\mathbf{z}_s}{\sqrt{2}} - \mathbf{M}_{\lambda_{(s-1)}} \mathbf{r}_{sm_1} \right) \\ &\in \left[ \mathbf{r}_{sm_1}^\top \mathbf{M}_{\lambda_{(s-1)}} \mathbf{r}_{sm_1} - \sqrt{\sigma_1(\mathbf{M}_{\lambda_{(s-1)}}) \cdot \tilde{\epsilon}}, \mathbf{r}_{sm_1}^\top \mathbf{M}_{\lambda_{(s-1)}} \mathbf{r}_{sm_1} + \sqrt{\sigma_1(\mathbf{M}_{\lambda_{(s-1)}}) \cdot \tilde{\epsilon}} \right] \\ &\in \left[ \mathbf{r}_{sm_1}^\top \mathbf{M}_{\lambda_{(s-1)}} \mathbf{r}_{sm_1} - \sqrt{\bar{\sigma}\tilde{\epsilon}}, \mathbf{r}_{sm_1}^\top \mathbf{M}_{\lambda_{(s-1)}} \mathbf{r}_{sm_1} + \sqrt{\bar{\sigma}\tilde{\epsilon}} \right], \end{aligned}$$

where we have used the Cauchy-Schwarz inequality in the second step.

In view of (26) and (28), it follows that

$$\begin{aligned} & \frac{1}{2} [\mathbf{u}_{sm_1}^\top \mathbf{v}_{sm_1}^\top] \begin{bmatrix} \Sigma_{xx} & \\ & \Sigma_{yy} \end{bmatrix} \mathbf{w}_s - \sqrt{\sigma} \tilde{\epsilon} \\ & \in \left[ \mathbf{r}_{sm_1}^\top \mathbf{M}_{\lambda_{(s-1)}} \mathbf{r}_{sm_1} - 2\sqrt{\sigma} \tilde{\epsilon}, \mathbf{r}_{sm_1}^\top \mathbf{M}_{\lambda_{(s-1)}} \mathbf{r}_{sm_1} \right] \\ & \in \left[ \frac{1}{2} \sigma_1(\mathbf{M}_{\lambda_{(s-1)}}), \sigma_1(\mathbf{M}_{\lambda_{(s-1)}}) \right]. \end{aligned}$$

By the definition of  $\Delta_s$  in Algorithm 3 and the fact that  $\sigma_1(\mathbf{M}_{\lambda_{(s-1)}}) = \frac{1}{\lambda_{(s-1)} - \rho_1}$ , we have

$$\Delta_s = \frac{1}{2} \cdot \frac{1}{\frac{1}{2} [\mathbf{u}_{sm_1}^\top \mathbf{v}_{sm_1}^\top] \begin{bmatrix} \Sigma_{xx} & \\ & \Sigma_{yy} \end{bmatrix} \mathbf{w}_s - \sqrt{\sigma} \tilde{\epsilon}} \in \left[ \frac{1}{2} (\lambda_{(s-1)} - \rho_1), \lambda_{(s-1)} - \rho_1 \right]. \quad (29)$$

And as a result,

$$\lambda_{(s)} = \lambda_{(s-1)} - \frac{\Delta_s}{2} \geq \lambda_{(s-1)} - \frac{1}{2} (\lambda_{(s-1)} - \rho_1) = \frac{\lambda_{(s-1)} + \rho_1}{2},$$

and thus by induction (note  $\lambda_{(0)} \geq \rho_1$ ) we have  $\lambda_{(s)} \geq \rho_1$  throughout the **repeat-until** loop.

From (29) we also obtain

$$\lambda_{(s)} - \rho_1 = \lambda_{(s-1)} - \rho_1 - \frac{\Delta_s}{2} \leq \lambda_{(s-1)} - \rho_1 - \frac{1}{4} (\lambda_{(s-1)} - \rho_1) = \frac{3}{4} (\lambda_{(s-1)} - \rho_1).$$

To sum up,  $\lambda_{(s)}$  approaches  $\rho_1$  from above and the gap between  $\lambda_{(s)}$  and  $\rho_1$  reduces at the geometric rate of  $\frac{3}{4}$ . Thus after at most  $t_3 = \lceil \log_{3/4} \left( \frac{\tilde{\Delta}}{\lambda_{(0)} - \rho_1} \right) \rceil \sim \mathcal{O} \left( \log \left( \frac{1}{\tilde{\Delta}} \right) \right)$  iterations, we reach a  $\lambda_{(t_3)}$  such that  $\lambda_{(t_3)} - \rho_1 \leq \tilde{\delta}$ . And in view of (29), the **repeat-until** loop exits in the next iteration. Hence, the overall number of iterations is at most  $t_3 + 1 = \mathcal{O} \left( \frac{1}{\tilde{\Delta}} \right)$ .

We now analyze  $\lambda_{(f)}$  and derive the interval it lies in. Note that  $\Delta_f \leq \tilde{\Delta}$  and  $\Delta_{f-1} > \tilde{\Delta}$  by the exiting condition. In view of (29), we have

$$\lambda_{(f)} - \rho_1 = \lambda_{(f-1)} - \rho_1 - \frac{\Delta_f}{2} \leq 2\Delta_f - \frac{\Delta_f}{2} = \frac{3\Delta_f}{2} \leq \frac{3\tilde{\Delta}}{2}.$$

On the other hand,

$$\lambda_{(f)} - \rho_1 = \lambda_{(f-1)} - \rho_1 - \frac{\Delta_f}{2} \geq \lambda_{(f-1)} - \rho_1 - \frac{1}{2} (\lambda_{(f-1)} - \rho_1) = \frac{1}{2} (\lambda_{(f-1)} - \rho_1). \quad (30)$$

If  $f = 1$ , then by our choice of  $\lambda_{(0)}$  we have that  $\lambda_{(f)} - \rho_1 \geq \tilde{\Delta}$ . Otherwise, by unfolding (30) one more time, we have that

$$\lambda_{(f)} - \rho_1 \geq \frac{1}{4} (\lambda_{(f-2)} - \rho_1) \geq \frac{\Delta_{f-1}}{4} \geq \frac{\tilde{\Delta}}{4}.$$

Thus in both case, we have that  $\lambda_{(f)} - \rho_1 \geq \frac{\tilde{\Delta}}{4}$  holds.

It remains to give an explicit bound on  $\tilde{\epsilon}$  based on the two requirements (26) and (27). Since the  $\lambda_{(s)}$  values are monotonically non-increasing and lower-bounded by  $\rho_1 + \frac{\tilde{\Delta}}{4}$ , we have

$$\max_s \sigma_1(\mathbf{M}_{\lambda_{(s)}}) = \sigma_1(\mathbf{M}_{\lambda_{(f)}}) = \frac{1}{\lambda_{(f)} - \rho_1} \leq \frac{4}{\tilde{\Delta}} =: \bar{\sigma},$$

and

$$\begin{aligned} \min_s \sigma_1(\mathbf{M}_{\lambda_{(s)}}) &= \sigma_1(\mathbf{M}_{\lambda_{(0)}}) = \frac{1}{\lambda_{(0)} - \rho_1} = \frac{1}{1 + \tilde{\Delta} - \rho_1} \\ &\geq \frac{1}{1 + c_2 \tilde{\Delta} - \tilde{\Delta}} \geq 1 + (1 - c_2) \tilde{\Delta} \geq 1 + \frac{1 - c_2}{c_2} \tilde{\Delta} := \underline{\sigma}, \end{aligned}$$

where the first inequality holds since by definition of  $\Delta$  it follows that  $\rho_1 = \rho_2 + \Delta \geq \Delta$ .

Therefore, for the assumption (26) to hold, we just need

$$\left(\frac{\sigma}{8\sqrt{\bar{\sigma}}}\right)^2 = \frac{\left(1 + \frac{1-c_2}{c_2}\tilde{\Delta}\right)^2}{64 \cdot \frac{4}{\tilde{\Delta}}} \geq \frac{1}{64 \cdot \frac{4}{\tilde{\Delta}}} = \frac{\tilde{\Delta}}{256} \geq \tilde{\epsilon}. \quad (31)$$

We now derive a lower bound of the right hand side of (27). Notice

$$\kappa_{\lambda(s)} = \frac{\lambda(s) + \rho_1}{\lambda(s) - \rho_1} = 1 + \frac{2\rho_1}{\lambda(s) - \rho_1} \leq 1 + 2\rho_1\bar{\sigma} \leq 1 + 2\bar{\sigma} \leq \frac{9}{\tilde{\Delta}}. \quad (32)$$

On the other hand,

$$\sigma_d(\mathbf{M}_{\lambda(s)}) \geq \sigma_d(\mathbf{M}_{\lambda(0)}) = \frac{1}{\lambda(0) + \rho_1} = \frac{1}{1 + \tilde{\Delta} + \rho_1} \geq \frac{1}{3}.$$

As a result, we have

$$\begin{aligned} \frac{\sigma_d(\mathbf{M}_{\lambda(s)})}{1024\kappa_{\lambda(s)}} \left(\frac{2\kappa_{\lambda(s)} - 1}{(2\kappa_{\lambda(s)})^{m_1} - 1}\right)^2 &\geq \frac{1}{3084 \cdot \frac{9}{\tilde{\Delta}}} \left(\frac{2\frac{9}{\tilde{\Delta}} - 1}{\left(2\frac{9}{\tilde{\Delta}}\right)^{m_1} - 1}\right)^2 \geq \frac{\left(\frac{17}{\tilde{\Delta}}\right)^2}{3084 \cdot \frac{9}{\tilde{\Delta}} \cdot \left(\frac{18}{\tilde{\Delta}}\right)^{m_1}} \\ &\geq \frac{1}{3084} \left(\frac{\tilde{\Delta}}{18}\right)^{m_1-1}. \end{aligned} \quad (33)$$

Our final bound on  $\tilde{\epsilon}$  chooses the smaller of (31) and (33).  $\square$

For the final **for** loop of Algorithm 3, we work in the accurate regime of power iterations.

**Lemma 11** (Iteration complexity of the final **for** loop in Algorithm 3). Suppose that  $\tilde{\Delta} \in [c_1\Delta, c_2\Delta]$  where  $c_2 \leq 1$ . Set  $m_2 = \lceil \frac{5}{4} \log \left( \frac{128}{\mu\eta^2} \right) \rceil$  and  $\tilde{\epsilon} \leq \frac{\eta^4}{4^{10}} \left( \frac{\tilde{\Delta}}{18} \right)^{m_2-1}$  in Algorithm 3. Then the  $(\mathbf{u}_T, \mathbf{v}_T)$  output by Phase I satisfies

$$\frac{1}{4}(\mathbf{u}_T^\top \Sigma_{xx} \mathbf{u}^* + \mathbf{v}_T^\top \Sigma_{yy} \mathbf{v}^*)^2 \geq 1 - \frac{\eta^2}{64}. \quad (34)$$

*Proof.* Notice when  $\lambda = \rho_1 + c(\rho_1 - \rho_2)$ , we have

$$\delta(\mathbf{M}_\lambda) = \frac{\sigma_1(\mathbf{M}_\lambda)}{\sigma_1(\mathbf{M}_\lambda) - \sigma_2(\mathbf{M}_\lambda)} = \frac{\frac{1}{\lambda - \rho_1}}{\frac{1}{\lambda - \rho_1} - \frac{1}{\lambda - \rho_2}} = \frac{\lambda - \rho_2}{\rho_1 - \rho_2} = \frac{\rho_1 + c(\rho_1 - \rho_2) - \rho_2}{\rho_1 - \rho_2} = c + 1.$$

In view of (25),  $\lambda_{(f)} - \rho_1 \leq \frac{3}{2}\tilde{\Delta} \leq \frac{3c_2}{2}\Delta \leq \frac{3}{2}\Delta$ , and thus  $\delta(\mathbf{M}_{\lambda_{(f)}}) \leq \frac{5}{2}$ .

Set  $\alpha = \frac{\eta^2}{64}$  in Lemma 8 (accurate regime), and with our choice of  $m_2$  and

$$\tilde{\epsilon} \leq \frac{\eta^4 \cdot \sigma_d(\mathbf{M}_{\lambda_{(f)}})}{64^3 \cdot \kappa_{\lambda_{(f)}}} \left(\frac{2\kappa_{\lambda_{(f)}} - 1}{(2\kappa_{\lambda_{(f)}})^{m_2} - 1}\right)^2, \quad (35)$$

we are guaranteed to obtain the desired alignment.

We now give a lower bound of the right hand side of (35). First,

$$\sigma_d(\mathbf{M}_{\lambda_{(f)}}) = \frac{1}{\lambda_{(f)} + \rho_1} \geq \frac{1}{\rho_1 + \frac{3}{2}\Delta + \rho_1} \geq \frac{1}{4}.$$

Recall that we have proved in (32) that  $\kappa_{\lambda_{(f)}} \leq \frac{9}{\tilde{\Delta}}$ . Following a derivation similar to that of (33), we have

$$\frac{\eta^4 \cdot \sigma_d(\mathbf{M}_{\lambda_{(f)}})}{64^3 \cdot \kappa_{\lambda_{(f)}}} \left(\frac{2\kappa_{\lambda_{(f)}} - 1}{(2\kappa_{\lambda_{(f)}})^{m_2} - 1}\right)^2 \geq \frac{\eta^4}{4^{10}} \left(\frac{\tilde{\Delta}}{18}\right)^{m_2-1}, \quad (36)$$

and this explains the  $\epsilon$  we set in the lemma.  $\square$

**Proof of Theorem 4.** As shown in Lemma 11, the **repeat-until** loop runs  $\mathcal{O}\left(\log\left(\frac{1}{\Delta}\right)\right) \sim \mathcal{O}\left(\log\left(\frac{1}{\Delta}\right)\right)$  iterations, and inside each iteration, we run  $m_1$  approximate matrix-vector multiplications. On the other hand, the final **for** loop runs  $m_2$  approximate matrix-vector multiplications. By the definitions of  $m_1$  and  $m_2$ , the total number of invocations of approximate matrix-vector multiplications/least squares problems is

$$m_1 \cdot \log\left(\frac{1}{\Delta}\right) + m_2 \sim \mathcal{O}\left(\log\left(\frac{1}{\mu}\right) \log\left(\frac{1}{\Delta}\right) + \log\left(\frac{1}{\mu\eta^2}\right)\right) \sim \tilde{\mathcal{O}}(1).$$

□

## G Proof of Theorem 5

*Proof.* Notice that the eigenvectors of  $\mathbf{M}_\lambda$  form an orthonormal bases of  $\mathbb{R}^{d_x+d_y}$ . Thus when (34) holds, i.e., the alignment between  $\begin{bmatrix} \Sigma_{xx}^{\frac{1}{2}} \tilde{\mathbf{u}}_T \\ \Sigma_{yy}^{\frac{1}{2}} \tilde{\mathbf{v}}_T \end{bmatrix}$  and  $\begin{bmatrix} \Sigma_{xx}^{\frac{1}{2}} \mathbf{u}^* \\ \Sigma_{yy}^{\frac{1}{2}} \mathbf{v}^* \end{bmatrix}$  is large, the alignments between

$\begin{bmatrix} \Sigma_{xx}^{\frac{1}{2}} \tilde{\mathbf{u}}_T \\ \Sigma_{yy}^{\frac{1}{2}} \tilde{\mathbf{v}}_T \end{bmatrix}$  and other eigenvectors have to be small. In particular, the alignment between  $\begin{bmatrix} \Sigma_{xx}^{\frac{1}{2}} \tilde{\mathbf{u}}_T \\ \Sigma_{yy}^{\frac{1}{2}} \tilde{\mathbf{v}}_T \end{bmatrix}$  and the tailing eigenvector  $\begin{bmatrix} \Sigma_{xx}^{\frac{1}{2}} \mathbf{u}^* \\ -\Sigma_{yy}^{\frac{1}{2}} \mathbf{v}^* \end{bmatrix}$  has to be small:

$$(\mathbf{u}_T^\top \Sigma_{xx} \mathbf{u}^* - \mathbf{v}_T^\top \Sigma_{yy} \mathbf{v}^*)^2 \leq \frac{\eta^2}{16}. \quad (37)$$

From (37) and (34), we have respectively

$$-\frac{\eta}{4} \leq |\mathbf{u}_T^\top \Sigma_{xx} \mathbf{u}^*| - |\mathbf{v}_T^\top \Sigma_{yy} \mathbf{v}^*| \leq \frac{\eta}{4},$$

$$|\mathbf{u}_T^\top \Sigma_{xx} \mathbf{u}^*| + |\mathbf{v}_T^\top \Sigma_{yy} \mathbf{v}^*| \geq 2\sqrt{1 - \frac{\eta^2}{64}} \geq 2\left(1 - \frac{\eta}{8}\right)$$

where we have used the fact that  $\sqrt{1-x} \geq 1 - \sqrt{x}$  for  $x \in [0, 1]$  in the second inequality.

Averaging the above two inequalities gives

$$|\mathbf{u}_T^\top \Sigma_{xx} \mathbf{u}^*| \geq 1 - \frac{\eta}{4}, \quad |\mathbf{v}_T^\top \Sigma_{yy} \mathbf{v}^*| \geq 1 - \frac{\eta}{4}.$$

Finally,

$$\begin{aligned} (\hat{\mathbf{u}}^\top \Sigma_{xx} \mathbf{u}^*)^2 + (\hat{\mathbf{v}}^\top \Sigma_{yy} \mathbf{v}^*)^2 &= \frac{(\mathbf{u}_T^\top \Sigma_{xx} \mathbf{u}^*)^2}{\mathbf{u}_T^\top \Sigma_{xx} \mathbf{u}_T} + \frac{(\mathbf{v}_T^\top \Sigma_{yy} \mathbf{v}^*)^2}{\mathbf{v}_T^\top \Sigma_{yy} \mathbf{v}_T} \\ &\geq \left(1 - \frac{\eta}{4}\right)^2 \left(\frac{1}{\mathbf{u}_T^\top \Sigma_{xx} \mathbf{u}_T} + \frac{1}{\mathbf{v}_T^\top \Sigma_{yy} \mathbf{v}_T}\right) \\ &\geq \left(1 - \frac{\eta}{4}\right)^2 \frac{4}{\mathbf{u}_T^\top \Sigma_{xx} \mathbf{u}_T + \mathbf{v}_T^\top \Sigma_{yy} \mathbf{v}_T} \\ &\geq 2\left(1 - \frac{\eta}{2}\right) = 2 - \eta \end{aligned}$$

where we have used the fact that  $\frac{1}{x} + \frac{1}{y} \geq \frac{4}{x+y}$  in the first inequality, and (10) in the second inequality. Then the theorem follows from the fact that  $(\hat{\mathbf{u}}^\top \Sigma_{xx} \mathbf{u}^*)^2$  and  $(\hat{\mathbf{v}}^\top \Sigma_{yy} \mathbf{v}^*)^2$  can be at most 1. □

## H Condition number of $h_t$ for SVRG

**Lemma 12.** Throughout Algorithm 3, the condition number of  $h_t$  for SVRG is at most  $\frac{9/c}{\Delta} \tilde{\kappa}$ , where

$$\tilde{\kappa} := \frac{\max_i \max \left( \|\mathbf{x}_i\|^2, \|\mathbf{y}_i\|^2 \right)}{\min(\sigma_{\min}(\Sigma_{xx}), \sigma_{\min}(\Sigma_{yy}))}.$$

*Proof.* The gradient Lipschitz constant of  $h_t^i(\mathbf{u}, \mathbf{v})$  is bounded by the largest eigenvalue (in absolute value) of its Hessian<sup>8</sup>

$$\mathbf{Q}_\lambda^i = \begin{bmatrix} \lambda \mathbf{x}_i \mathbf{x}_i^\top & -\mathbf{x}_i \mathbf{y}_i^\top \\ -\mathbf{y}_i \mathbf{x}_i^\top & \lambda \mathbf{y}_i \mathbf{y}_i^\top \end{bmatrix},$$

and the largest eigenvalue is defined as

$$\max_{\mathbf{g}_x \in \mathbb{R}^{d_x}, \mathbf{g}_y \in \mathbb{R}^{d_y}} \beta := \left| [\mathbf{g}_x^\top, \mathbf{g}_y^\top] \mathbf{Q}_\lambda^i \begin{bmatrix} \mathbf{g}_x \\ \mathbf{g}_y \end{bmatrix} \right| \quad \text{s.t.} \quad \|\mathbf{g}_x\|^2 + \|\mathbf{g}_y\|^2 = 1.$$

We have

$$\begin{aligned} \beta &= |\lambda(\mathbf{g}_x^\top \mathbf{x}_i)^2 + \lambda(\mathbf{g}_y^\top \mathbf{y}_i)^2 - 2(\mathbf{g}_x^\top \mathbf{x}_i)(\mathbf{g}_y^\top \mathbf{y}_i)| \\ &\leq \lambda(\mathbf{g}_x^\top \mathbf{x}_i)^2 + \lambda(\mathbf{g}_y^\top \mathbf{y}_i)^2 + 2|\mathbf{g}_x^\top \mathbf{x}_i| |\mathbf{g}_y^\top \mathbf{y}_i| \\ &\leq \lambda(\mathbf{g}_x^\top \mathbf{x}_i)^2 + \lambda(\mathbf{g}_y^\top \mathbf{y}_i)^2 + (\mathbf{g}_x^\top \mathbf{x}_i)^2 + (\mathbf{g}_y^\top \mathbf{y}_i)^2 \\ &= (\lambda + 1) ((\mathbf{g}_x^\top \mathbf{x}_i)^2 + (\mathbf{g}_y^\top \mathbf{y}_i)^2) \\ &\leq (\lambda + 1) (\|\mathbf{g}_x\|^2 \|\mathbf{x}_i\|^2 + \|\mathbf{g}_y\|^2 \|\mathbf{y}_i\|^2) \\ &\leq (\lambda + 1) \max(\|\mathbf{x}_i\|^2, \|\mathbf{y}_i\|^2) \end{aligned}$$

where we have used the Cauchy-Schwarz inequality and the constraint in the third and the last inequality respectively.

It only remains to bound  $\frac{\lambda+1}{\lambda-\rho}$ . Note that we have shown in Lemma 10 that  $\lambda \geq \rho_1 + \frac{\tilde{\Delta}}{4}$  throughout Algorithm 3, and thus

$$\frac{\lambda+1}{\lambda-\rho} = 1 + \frac{1+\rho}{\lambda-\rho} \leq 1 + \frac{2}{\lambda-\rho} \leq 1 + 2\frac{4}{\tilde{\Delta}} \leq \frac{9}{\tilde{\Delta}} \leq \frac{9/c_1}{\Delta}.$$

□

## I More details of the experiments

The statistics of these datasets are summarized in Table 2. These datasets have also been used by [3, 4] for demonstrating their stochastic CCA algorithms.

Table 2: Brief summary of datasets.

| Datasets  | Description                            | $d_x$ | $d_y$ | $N$    |
|-----------|----------------------------------------|-------|-------|--------|
| Mediamill | Image and its labels                   | 100   | 120   | 30,000 |
| JW11      | Acoustic and articulation measurements | 273   | 112   | 30,000 |
| MNIST     | Left and right halves of images        | 392   | 392   | 60,000 |

We now provide additional details for the experiments. For **s-AppGrad**, both gradient and normalization steps are estimated with mini-batches of 100 samples (the authors of [3] suggest that the mini-batch size shall be at least the same magnitude as the dimensionality of the CCA projection). For **SI-VR** and **SI-AVR**, within the **repeat-until** loop, we apply SVRG with  $M = 2$  epochs to approximately find the top eigenvector  $\mathbf{w}_s$ , and SVRG with  $M = 2$  epochs to approximately calculate its top eigenvalue of  $\mathbf{M}_{\lambda(s)}$  as  $\mathbf{w}_s^T \mathbf{M}_{\lambda(s)} \mathbf{w}_s$ . We exit the **repeat-until** loop when  $\Delta_s \leq 0.06$ . Afterwards, for the fixed  $\lambda_{(f)}$ , we apply SVRG to solve every least squares problems with  $M = 4$  epochs. Each epoch of SVRG includes a batch gradient evaluation and  $m = N$  stochastic gradient steps. We set the step size according to the smoothness for each least squares solver, i.e.,  $\frac{1}{\sigma_{\max}(\Sigma_{xx})}$  for GD/AGD in AppGrad/s-AppGrad/CCALin, and  $\frac{1}{\max_i \|\mathbf{x}_i\|^2}$  for SVRG/ASVRG in our algorithms.

<sup>8</sup>We omit the regularization terms, which are typically very small, to have concise expressions.

## **J Other related work**

Recent years have witnessed continuous efforts to scale up fundamental methods such as principal component analysis (PCA) and partial least squares with stochastic/online updates [22, 23, 24, 25, 5, 16, 17]. But as pointed out by [23], the CCA objective is more challenging due to the constraints.

[26] proposed an adaptive CCA algorithm with efficient online updates based on matrix manifolds defined by the constraints. However, the goal of their algorithm is anomaly detection for streaming data with a varying distribution, rather than to optimize the CCA objective on a given dataset. Similar to our algorithms, the stochastic CCA algorithms of [3, 4] are motivated by the ALS formulation. [5] proposed a stochastic algorithm based on the Lagrangian formulation of the objective (1). None of these online/stochastic algorithms have rigorous global convergence guarantee.
